# Supplementary material for: Rational design of 3D hierarchical foam-like Fe2O3@CuOxmonolith catalysts for selective catalytic reduction of NO with NH3
Source: Royal Society of Chemistry journal article supplement (doi:10.1039/c4ra14735a), 2015-01-01
Supplement: c4ra14735a1.pdf [file c4ra14735a1.pdf]

*Electronic Supplementary Information (ESI)*

**Rational design of 3D hierarchical foam-like  $\text{Fe}_2\text{O}_3@\text{CuO}_x$  monolith catalysts for selective catalytic reduction of NO with  $\text{NH}_3$**

*Cheng Fang, Liyi Shi, Hang Hu, Jianping Zhang and Dengsong Zhang\**

Research Center of Nano Science and Technology, School of Material Science and Engineering, Shanghai University, Shanghai 200444, China.

\* Corresponding authors: Fax: +86-21-66136079; E-mail: dszhang@shu.edu.cn

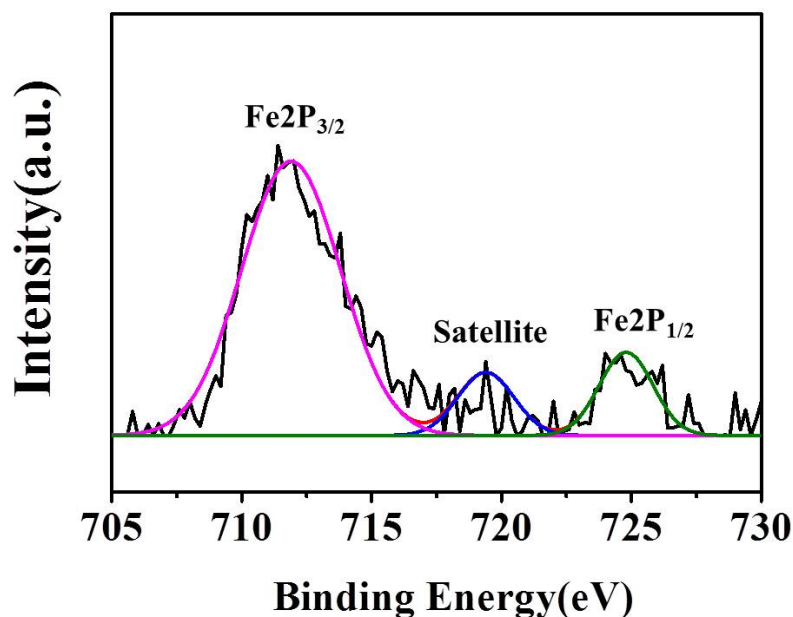

**Fig S1.** XPS spectra for Fe 2p of the  $\text{Fe}_2\text{O}_3@\text{CuO}_x$  foam.

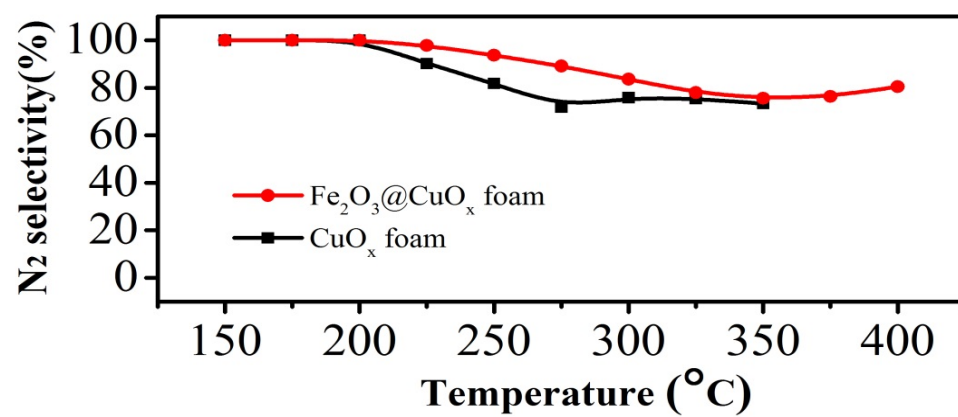

**Fig S2.** Plots of N<sub>2</sub> selectivity of the catalysts vs. temperature.

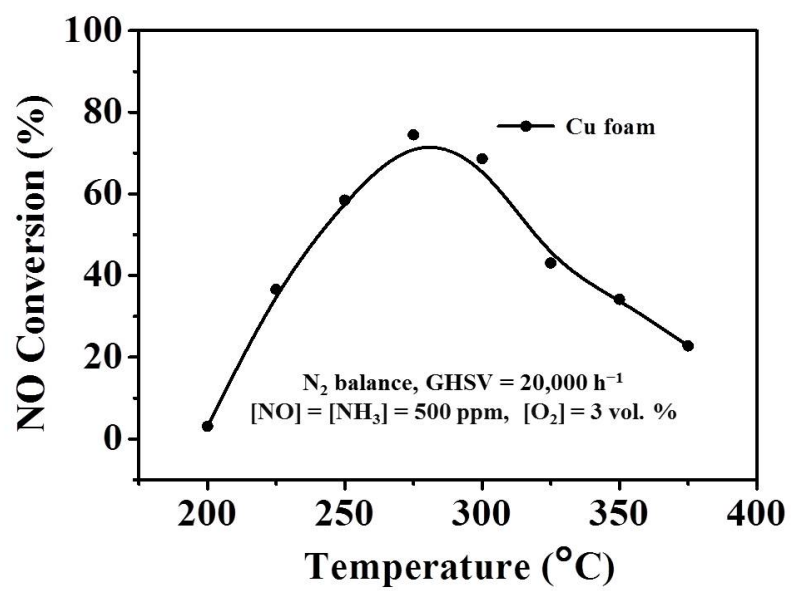

**Fig S3.** Plot of NO conversion of the Cu foam vs. temperature.

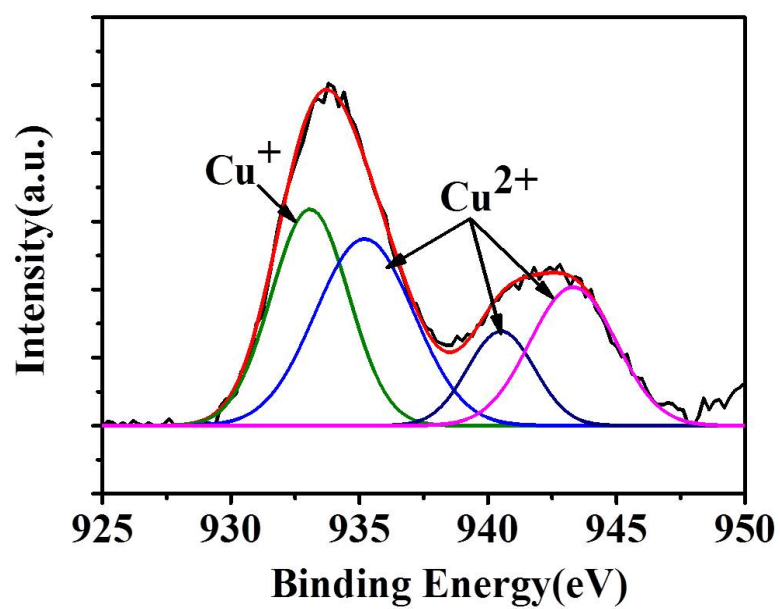

**Fig S4.** XPS spectra for Cu 2p of the used  $\text{Fe}_2\text{O}_3@\text{CuO}_x$  foam.

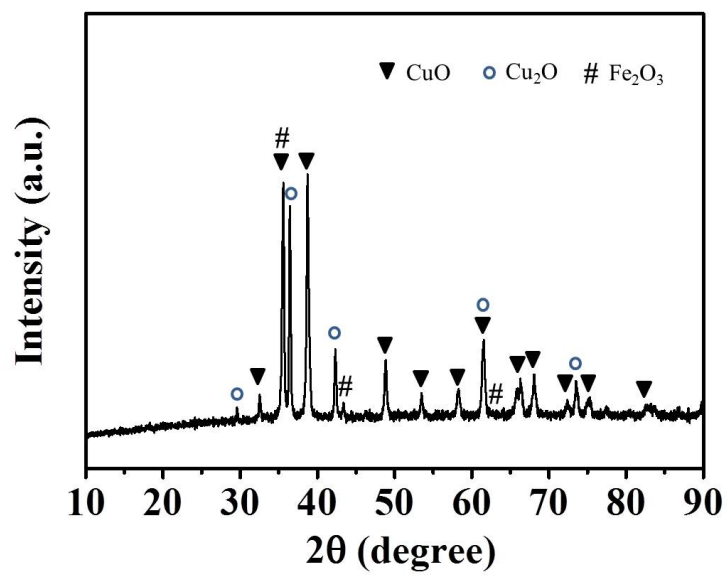

**Fig S5.** XRD pattern of the used Fe<sub>2</sub>O<sub>3</sub>@CuO<sub>x</sub> foam.

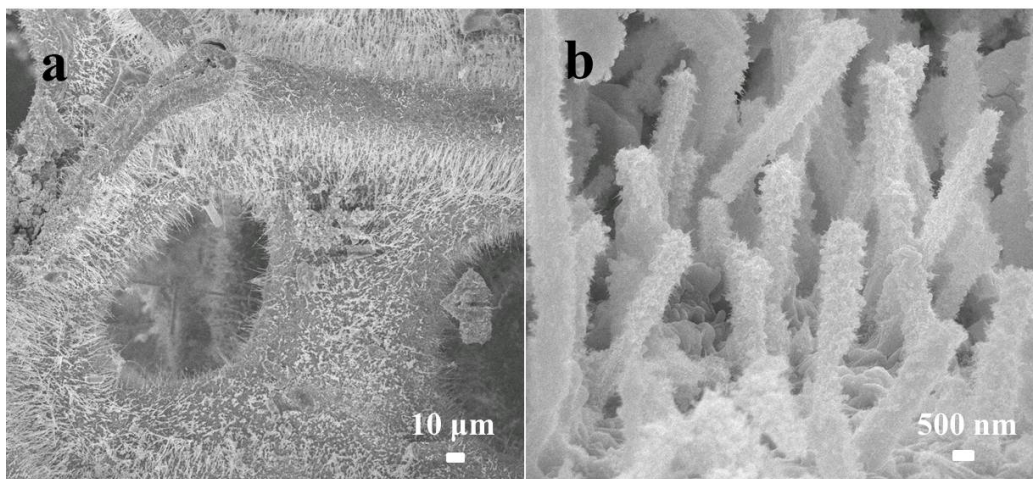

**Fig S6.** Low resolution (a) and high resolution (b) SEM images of the  $\text{Fe}_2\text{O}_3@\text{CuO}_x$  foam after the 6.5 h  $\text{NH}_3$ -SCR duration test under the coexistence of 8 vol. %  $\text{H}_2\text{O}$  and 250 ppm  $\text{SO}_2$ .

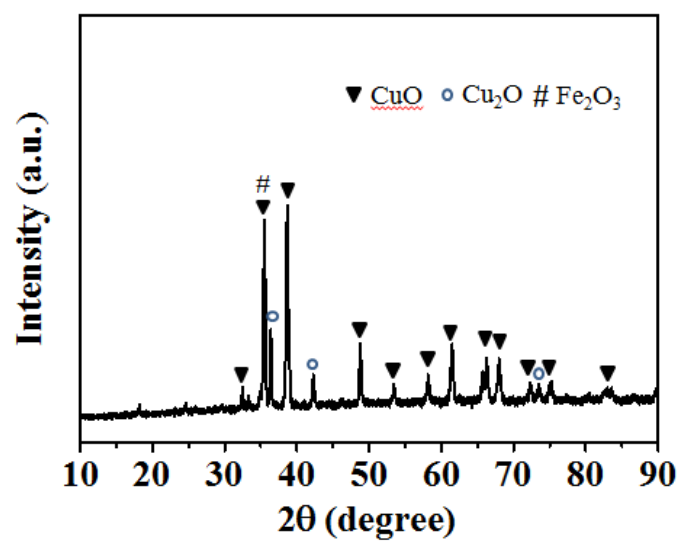

**Fig S7.** XRD pattern of the Fe<sub>2</sub>O<sub>3</sub>@CuO<sub>x</sub> foam after the anti-toxicity test.
